# Supplementary material for: Sarcoplasmic Reticulum from Horse Gluteal Muscle Is Poised for Enhanced Calcium Transport
Source: MDPI journal article supplement (doi:10.3390/vetsci8120289), 2021-11-23
Supplement: s1 [file s1]

## SUPPLEMENTAL DATA

### Sarcoplasmic reticulum from horse gluteal muscle is poised for enhanced calcium transport

Joseph M. Autry <sup>1</sup>, Bengt Svensson <sup>1</sup>, Samuel F. Carlson <sup>1</sup>, Zhenhui Chen <sup>2</sup>,  
Razvan L. Cornea <sup>1</sup>, David D. Thomas <sup>1,†</sup>, Stephanie J. Valberg <sup>3,†</sup>

<sup>1</sup> University of Minnesota, Dept. of Biochemistry, Molecular Biology, and Biophysics

<sup>2</sup> Indiana University School of Medicine, Dept. of Medicine, Krannert Institute of Cardiology

<sup>3</sup> Michigan State University, Dept. of Large Animal Clinical Sciences, McPhail Equine Performance Center

<sup>†</sup> Co-Senior Authors

|       |                                                                                                                                |
|-------|--------------------------------------------------------------------------------------------------------------------------------|
| p. S1 | <b>Table of Contents</b>                                                                                                       |
| p. S2 | <b>Table S1.</b> Horse muscle tissue samples.                                                                                  |
| p. S3 | <b>Table S2.</b> Densitometry data for Coomassie gel.                                                                          |
| p. S4 | <b>Figure S1.</b> SLN Western blot of SR vesicles using a novel, custom-ordered anti-horse-SLN polyclonal antibodies pAb 3378. |
| p. S5 | <b>References</b>                                                                                                              |

**Table S1: List of horse muscle tissue samples.**

| <b>Animal Number</b> | <b>Source</b>  | <b>Species Breed</b> | <b>Sex</b>     | <b>Age</b> | <b>Husbandry</b> |
|----------------------|----------------|----------------------|----------------|------------|------------------|
| 9560                 | Owner donation | Quarter horse        | Male, castrate | 10         | Stall/pasture    |
| 9623                 | Owner donation | Quarter horse        | Female         | 18         | Stall/pasture    |
| 9657                 | Owner donation | Thoroughbred         | Male, castrate | 10         | Stall/pasture    |
| 12121                | Owner donation | Quarter Horse        | Male, castrate | 16         | Stall/pasture    |

**Table S2: Densitometry data for Coomassie gel.**

| Sample   | SERCA band density | CASQ Band Density | Ratio CASQ/SERCA: |
|----------|--------------------|-------------------|-------------------|
| Rabbit 1 | 1873216            | 541632            | 0.29              |
| Rabbit 2 | 1859840            | 648192            | 0.35              |
| Rabbit 3 | 2588032            | 596736            | 0.23              |
| Rabbit 4 | 2964864            | 582464            | 0.20              |
| Rabbit 5 | 2695296            | 537984            | 0.20              |
| Horse 1  | 1168000            | 628480            | 0.54              |
| Horse 2  | 1389824            | 713856            | 0.51              |
| Horse 3  | 952192             | 549440            | 0.58              |
| Horse 4  | 1561152            | 880960            | 0.56              |

The Coomassie-stained gels were analyzed to quantitate the relative absorbance of the SERCA and CASQ protein band using a GelDoc EZ imaging system with the software Image Lab 5.0 (Bio-Rad Laboratories Incorporated; Hercules, CA). The amount of SERCA in horse SR is  $0.53 \pm 0.07$  ( $p=0.005$ ) times the amount of SERCA in rabbit SR, i.e. ~45% lower. The CASQ amount in horse SR is  $1.19 \pm 0.11$  ( $p=0.21$ ) times the rabbit amount, i.e. ~20 % higher. The average ratio for CASQ to SERCA was in rabbit  $0.24 \pm 0.03$  and in horse  $0.55 \pm 0.01$  ( $p=0.0001$ ), i.e. a  $2.25 \pm 0.25$  times higher CASQ/SERCA ratio.

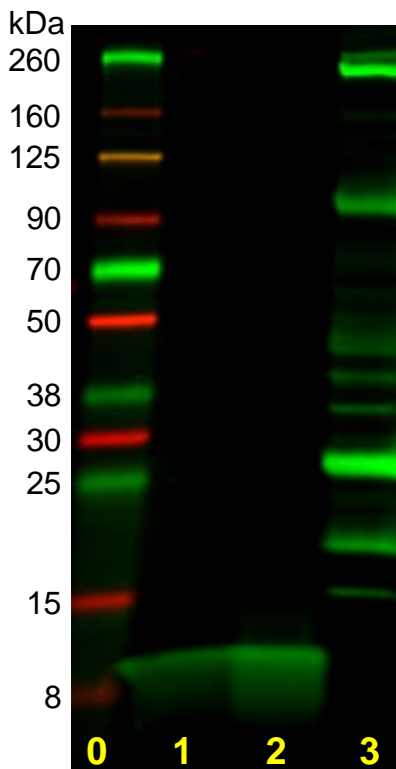

**Figure S1. Immunoblot of SR vesicles using the new anti-horse-SLN polyclonal antibody pAb 3378.**

We raised a polyclonal antibody against horse SLN (pAb GS3378) to validate previously published immunoblot results (1,2). This primary antibody was custom ordered from Genscript (Piscataway, NJ) using a peptide containing horse SLN residues <sup>1</sup>MEWRRE<sup>6</sup> as the immunogen. Samples were electrophoresed through a Criterion<sup>TM</sup> Precast Gel (4-20% TGX, 18 Well Comb, 30 µL; Cat #: 567-1094) and immunoblotting was performed as previously published (2). Lane 0: 3 µL Chameleon SDS-PAGE standard (Li-Cor # 928-60000). Lane 1: 0.01 µg Horse SLN standard. Lane 2: 0.025 µg Horse SLN standard. Lane 3: 10 µg horse SR (10K). The results were the same as with previous antibodies i.e., only very low levels of horse SLN were detected in horse SR vesicles.

## REFERENCES

1. Autry, J. M., Karim, C. B., Cocco, M., Carlson, S. F., Thomas, D. D., and Valberg, S. J. (2020) Purification of sarcoplasmic reticulum vesicles from horse gluteal muscle. *Anal Biochem* **610**, 113965
2. Autry, J. M., Karim, C. B., Perumbakkam, S., Finno, C. J., McKenzie, E. C., Thomas, D. D., and Valberg, S. J. (2020) Sarcolipin Exhibits Abundant RNA Transcription and Minimal Protein Expression in Horse Gluteal Muscle. *Vet Sci* **7**, 178
